# Supplementary material for: Phosphorized SnO2/graphene heterostructures for highly reversible lithium-ion storage with enhanced pseudocapacitance
Source: Royal Society of Chemistry journal article supplement (doi:10.1039/c7ta10435a), 2018-01-01
Supplement: c7ta10435a1.pdf [file c7ta10435a1.pdf]

## Supporting Information

### Partially Phosphorized SnO<sub>2</sub>/Graphene Nanocomposite for Highly Reversible Pseudocapacitive Lithium-Ion Storage

Ying Yang,<sup>a, b</sup> Xu Zhao,<sup>b</sup> Hong-En Wang,<sup>b</sup> Malin Li,<sup>b</sup> Ce Hao,<sup>a</sup> Min Ji,<sup>a</sup> Suzhen Ren,<sup>\* a</sup> Guozhong Cao<sup>\*</sup>

<sup>a, b</sup>

<sup>a</sup> College of Chemistry, Dalian University of Technology, Dalian 116024, China.

<sup>b</sup> Department of Materials Science and Engineering, University of Washington, Seattle, WA 98195, USA

\*Corresponding author: [rensz@dlut.edu.cn](mailto:rensz@dlut.edu.cn); [gzcao@u.washington.edu](mailto:gzcao@u.washington.edu)

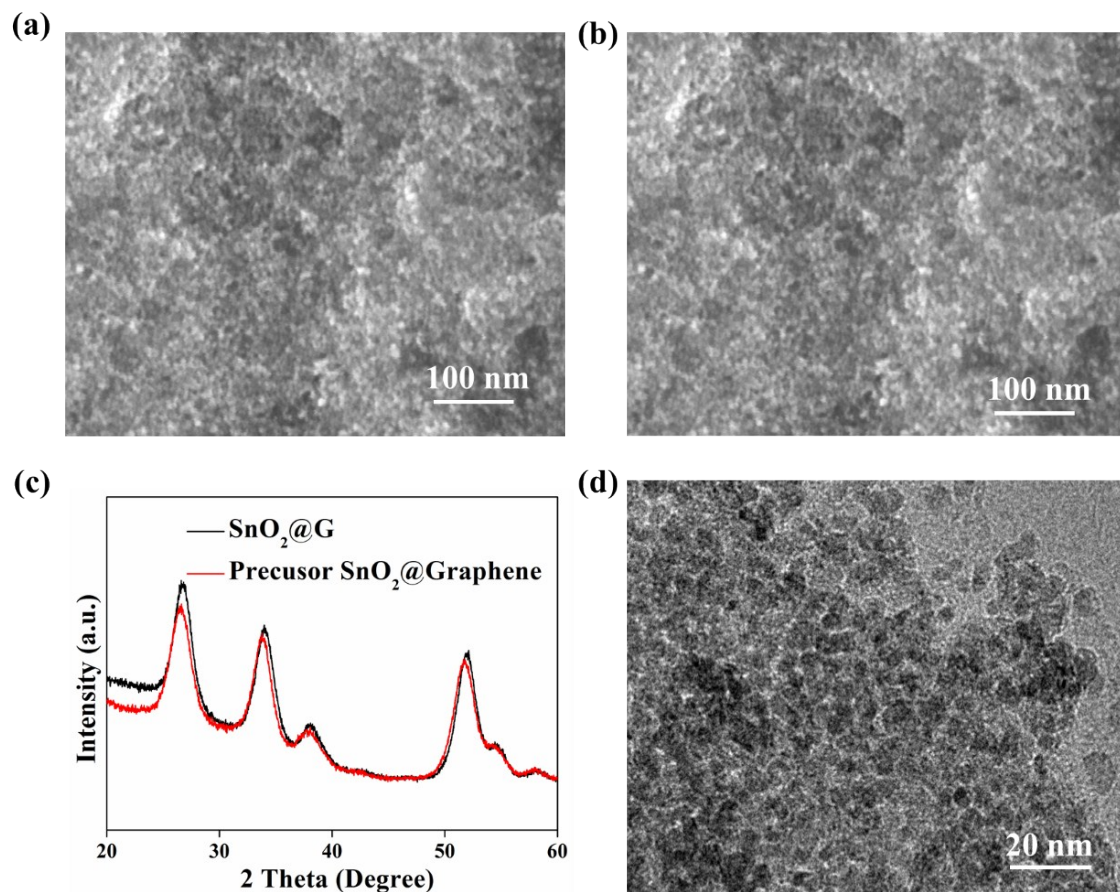

Figure S1. Scanning electron microscope (SEM) images of (a) SnO<sub>2</sub>@G-Pre composite and (b) SnO<sub>2</sub>@G composite after annealing; (c) XRD curves of SnO<sub>2</sub>@G composite before and after annealing; (d) transmission electron microscope image (TEM) of SnO<sub>2</sub>@G after annealing.

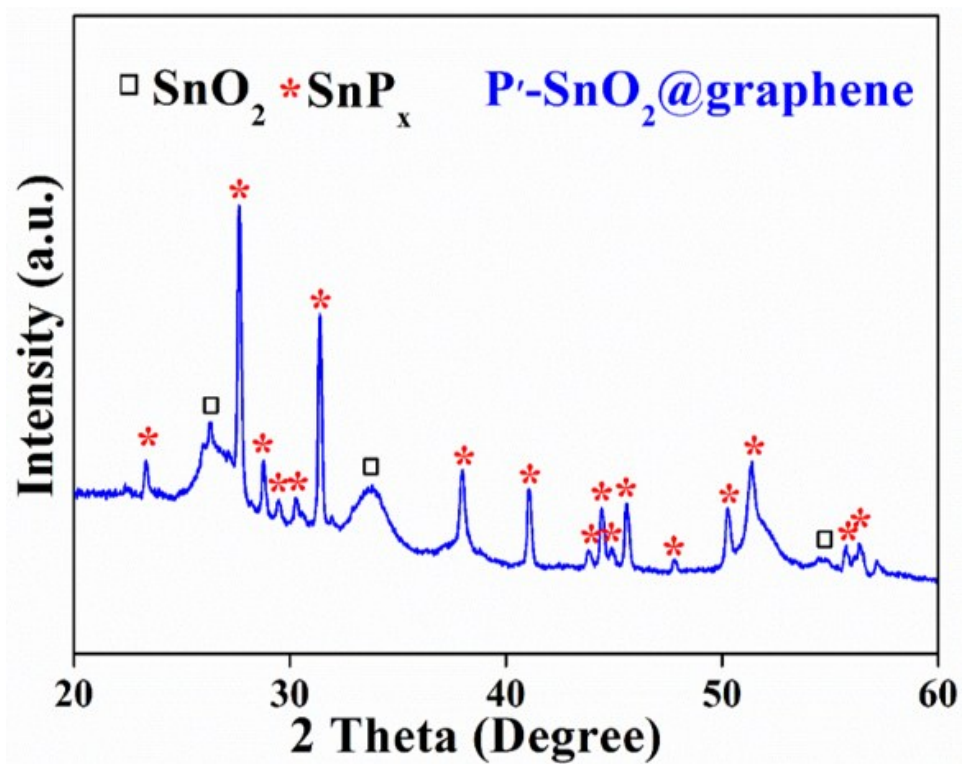

Figure S2. XRD pattern of P-SnO<sub>2</sub>@G-10 phosphorized at low molar ratio of Sn and P (1:10).

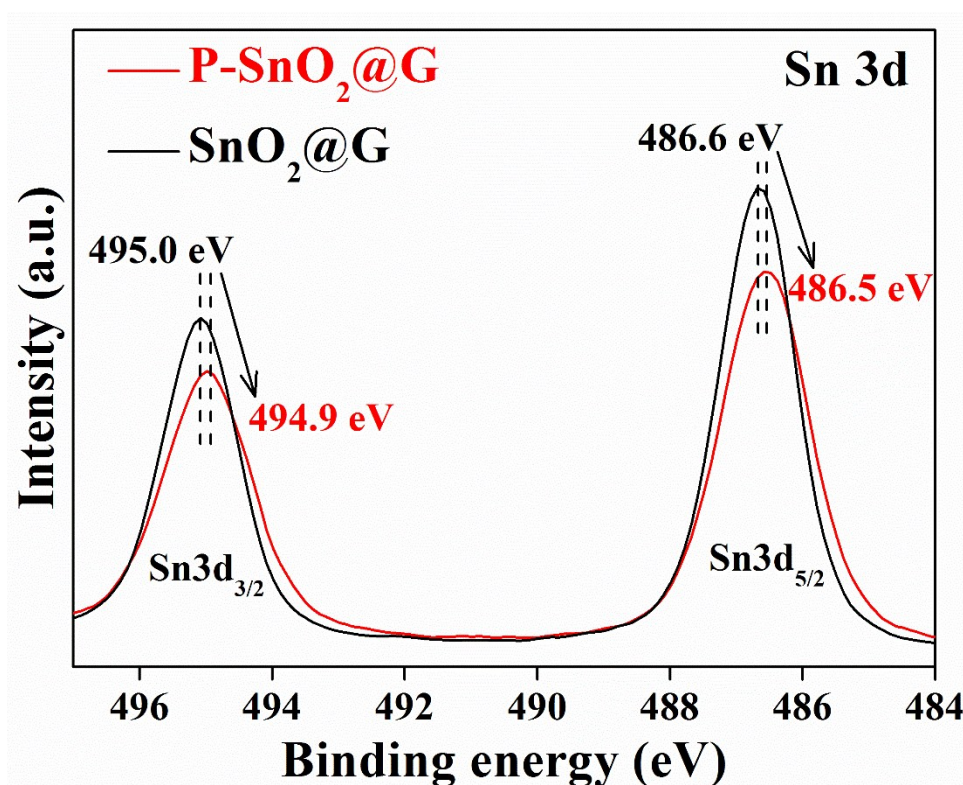

Figure S3. High-resolution XPS spectra of Sn 3d in SnO<sub>2</sub>@G and P-SnO<sub>2</sub>@G.

Table S1. The element composition of P-SnO<sub>2</sub>@G estimated based on Energy dispersive spectrometer (EDS).

| Element | Weight% | Atomic% |
|---------|---------|---------|
| C       | 11.52   | 35.88   |
| N       | 2.15    | 1.14    |
| O       | 13.31   | 29.98   |
| P       | 10.43   | 12.60   |
| Sn      | 62.59   | 20.41   |

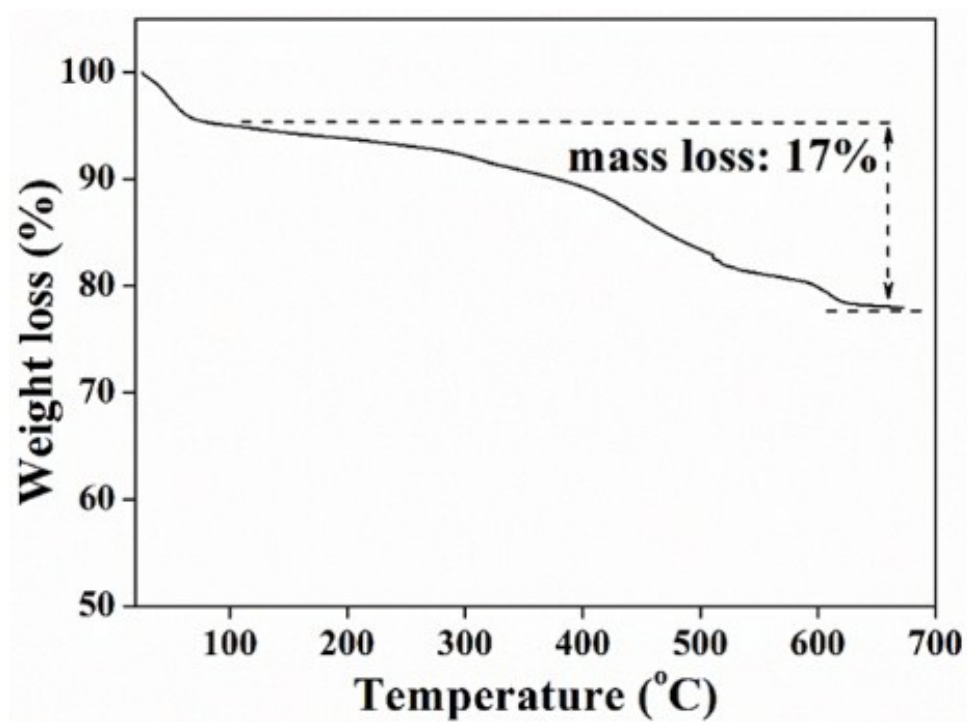

Figure S4. Thermogravimetric analysis curve of as-synthesized  $\text{SnO}_2@\text{G-Pre}$  composite

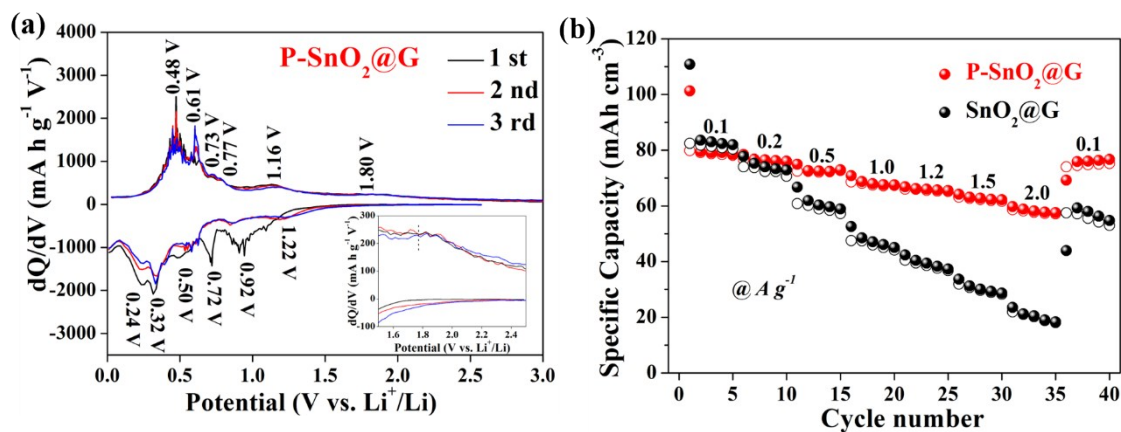

Figure S5. (a) Differential charge - discharge capacity plots of as-synthesized P-SnO<sub>2</sub>@G composite electrode at a current density of 0.1 mA g<sup>-1</sup> for the first three cycles; (b) Volumetric capability of SnO<sub>2</sub>@G and P-SnO<sub>2</sub>@G obtained at various current densities from 0.1 to 2 A g<sup>-1</sup>, then back to 0.1 A g<sup>-1</sup> in the potential window of 0.01 ~ 3.0 V.

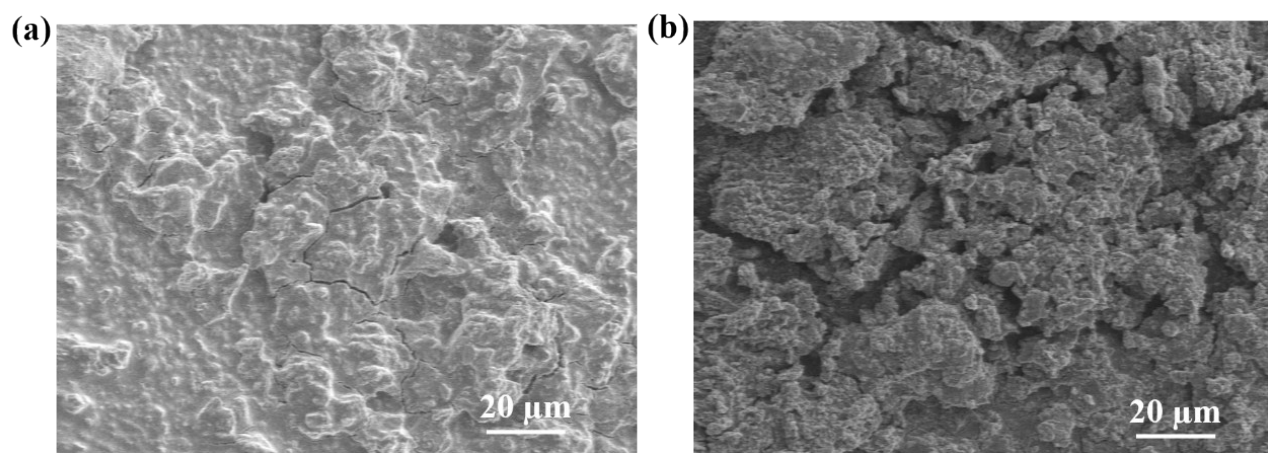

Figure S6. Ex situ SEM images of (a) P-SnO<sub>2</sub>@G; (b) SnO<sub>2</sub>@G after cycling



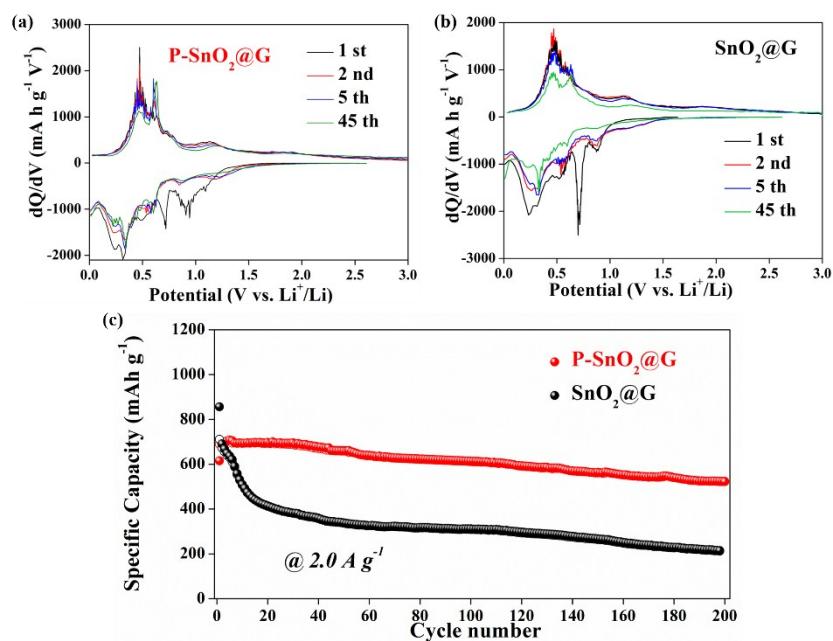

Figure S7. Differential discharge and charge capacity plots (DCPs) for the 1st, 2th, 5th and 45th cycles of (a) SnO<sub>2</sub>@G; (b) P-SnO<sub>2</sub>@G; (c) Cycling stability (200 cycles) of SnO<sub>2</sub>@G and P-SnO<sub>2</sub>@G at 2.0 A g<sup>-1</sup> in the potential of 0.01 ~ 3.0 V.

Table S2. The  $R_s$ ,  $R_f$ , and  $R_{ct}$  and  $\text{Li}^+$  diffusion coefficients of  $\text{SnO}_2@\text{G}$  and  $\text{P-SnO}_2@\text{G}$  electrode after 50 cycles at current density of  $1.0 \text{ A g}^{-1}$ .

| Sample                                         | $\text{SnO}_2@\text{G}$ | $\text{P-SnO}_2@\text{G}$ |
|------------------------------------------------|-------------------------|---------------------------|
| $R_s (\Omega)$                                 | 1.43                    | 4.17                      |
| $R_f (\Omega)$                                 | 47.71                   | 115.80                    |
| $R_{ct} (\Omega)$                              | 92.73                   | 157.30                    |
| $D_{\text{Li}^+} (\text{cm}^2 \text{ s}^{-1})$ | $6.50 \times 10^{-14}$  | $1.36 \times 10^{-13}$    |

(Note:  $R_s$  represents the combined ohmic resistance of the battery;  $R_f$  is resistance of surface film;  $R_{ct}$  is the value of the charge transfer resistance, fitted from Figure 5a)

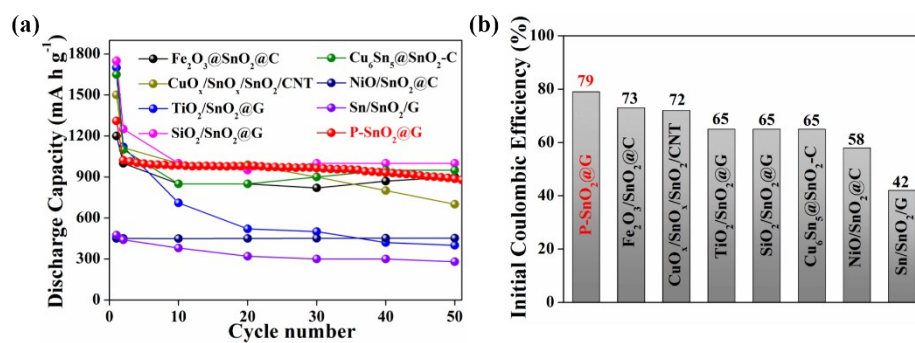

Figure S8. (a) Comparison of capacity retention and (b) initial coulombic efficiency of P-SnO<sub>2</sub>@G (0.01-3 V, 0.1 A g<sup>-1</sup>) with multiple components composite anodes including Fe<sub>2</sub>O<sub>3</sub>@SnO<sub>2</sub>@C (0.01-3 V, 0.2 A g<sup>-1</sup>), CuO<sub>x</sub>/SnO<sub>x</sub>/SnO<sub>2</sub>/CNT (0.005-2.7 V, 0.1 A g<sup>-1</sup>), TiO<sub>2</sub>/SnO<sub>2</sub>/C (0.01-3 V, 0.1 A g<sup>-1</sup>), SiO<sub>2</sub>/SnO<sub>2</sub>@G (0.01-2.5 V, 0.5 A g<sup>-1</sup>), Cu<sub>6</sub>Sn<sub>5</sub>@SnO<sub>2</sub>-C (0.05-3V, 0.2 A g<sup>-1</sup>), NiO/SnO<sub>2</sub>/C (0.01-3 V, 0.8 A g<sup>-1</sup>), Sn/SnO<sub>2</sub>@C (0.05-1.5 V, 0.05 A g<sup>-1</sup>). References is same with the main article.
